# Supplementary material
Source: HighWire-hosted journal article supplement (https://cmaj.ca/highwire/filestream/149385/field_highwire_adjunct_files/0/230143-five-1-at.pdf)
Supplement: 230143-five-1-at.pdf [file 230143-five-1-at.pdf]

## Appendix 1

| Anatomic Site  | Causes                                                         |
|----------------|----------------------------------------------------------------|
| Any Site       | Atrophy (breastfeeding, menopause)                             |
|                | Trauma                                                         |
|                | Malignancy                                                     |
|                | Pregnancy                                                      |
|                | Foreign body                                                   |
| Vulvar/Vaginal | Genital warts                                                  |
|                | Vulvar dermatoses (lichen sclerosus, lichen simplex chronicus) |
|                | Genital ulcers (herpes, syphilis, chancroid)                   |
|                | Contact dermatitis                                             |
|                | Vulvar/Vaginal intraepithelial neoplasia (VIN/VAIN)            |
|                | Pelvic organ prolapse                                          |
|                | Vulvovaginitis (bacterial vaginosis, yeast, trichomoniasis)    |
| Cervix         | Cervical polyp                                                 |
|                | Ectropion                                                      |
|                | Endometriosis                                                  |
|                | Cervical intraepithelial neoplasia (CIN)                       |
|                | Cervicitis (chlamydia, gonorrhea)                              |
| Uterus         | Endometrial polyp                                              |
|                | Submucosal fibroid                                             |
|                | Hyperplasia                                                    |
|                | Endometritis                                                   |

Sources of postcoital bleeding based on anatomic site and risk factors.<sup>1-4</sup>

## References

1. Tarney CM, Han J. Postcoital bleeding: a review on etiology, diagnosis, and management. *Obstet Gynecol Int* 2014;2014:192087.
2. Shapley M, Jordan J, Croft PR. A systematic review of postcoital bleeding and risk of cervical cancer. *Br J Gen Pract* 2006;56:453-60.
3. Owens GL, Wood NJ, Martin-Hirsch P. Investigation and management of postcoital bleeding. *Obstet Gynaecol* 2022;24:24-30.
4. Singh S, Best C, Dunn D, et al. No. 292: Abnormal uterine bleeding in pre-menopausal women. *J Obstet Gynaecol Can* 2018;40:e391-415.
